# Supplementary material for: Development of Group Brief Cognitive Behavioral Therapy Fidelity Assessment Instruments
Source: Research Square preprint supplement (doi:10.21203/rs.3.rs-8671387/v1), 2026-02-09
Supplement: Supplementary file 1 [file 3fb10cddf944d9e17b3b9c7a.docx]

**Therapists:**

**Group #:**

**Group Start Date:**

**Group End Date:**

**Reviewed by:**

**PHASE ONE: Emotion Regulation and Crisis Management**

**Group Session 1**

*no = 0, partial = 0.5, yes = 1

| **No** | **Partial** | **Yes** | | **Introduction to GBCBT** |
| --- | --- | --- | --- | --- |
|  |  |  | | Conducted Initial symptom/mood check |
|  |  |  | | Set the agenda |
|  |  |  | | Reviewed homework and treatment log |
|  |  |  | | Assigned homework |
|  |  |  | | Reviewed Three-phase model of treatment |
|  |  |  | | Explained role in crisis management, healthy social support, and skill building |
|  |  |  | | Reviewed expectations for group therapy: Attendance and Confidentiality |
|  |  |  | | Elicited input and feedback about structure of group |
|  |  |  | | Provided an opportunity for group members to ask questions about the structure of treatment |
| Total: /9 | | | Comments: | |

| **No** | **Partial** | **Yes** | **Commitment to Group Therapy Statement** |
| --- | --- | --- | --- |
|  |  |  | Explained rationale for commitment statement |
|  |  |  | Collaboratively reviewed statement with group |
|  |  |  | Elicited feedback and input from group regarding statement items and expectations |
|  |  |  | Invited group to add or modify statement |
|  |  |  | Gauged group’s understanding of statement |
|  |  |  | Had group member’s initial everyone’s statement |
| Total: /6 | | | Comments: |

| **No** | **Partial** | **Yes** | **Treatment Planning** |
| --- | --- | --- | --- |
|  |  |  | Explained rationale for treatment plan |
|  |  |  | Elicited feedback and input from group regarding treatment targets |
|  |  |  | Core treatment targets emphasized skill development |
|  |  |  | Established objective, measurable outcomes for treatment targets |
|  |  |  | Identified symptom hierarchy when presented with a mix of prominent symptoms |
|  |  |  | Gauged group's understanding of treatment plan |
|  |  |  | Set date for reviewing/revising treatment plan |
| Total: /7 | | | Comments: |

**Group Session 2**

| **No** | **Partial** | **Yes** | | **Therapeutic Frame** |
| --- | --- | --- | --- | --- |
|  |  |  | | Conducted Initial symptom/mood check |
|  |  |  | | Set the agenda |
|  |  |  | | Reviewed homework and treatment log |
|  |  |  | | Assigned homework |
| Total: /4 | | | Comments: | |

| **No** | **Partial** | **Yes** | **Skills Training: Sleep Disturbance** |
| --- | --- | --- | --- |
|  |  |  | Provide psychoeducation around stimulus control and sleep hygiene |
|  |  |  | Explicitly tied skill to suicidal mode |
|  |  |  | Review stimulus control and sleep hygiene principles (Appendix A.7) |
|  |  |  | Create individual plan for each group member |
|  |  |  | Gauge group understanding and mastery of skill |
|  |  |  | Assign skills practice for between-session practice |
|  |  |  | Use treatment journal, including its role as a relapse prevention tool |
|  |  |  | Encourage group members to record lessons learned from the session in treatment log |
| Total: /8 | | | Comments: |

| **No** | **Partial** | **Yes** | **Skills Training: Relaxation Training** |
| --- | --- | --- | --- |
|  |  |  | Explained rationale for skill |
|  |  |  | Explicitly tied skill to suicidal mode / case conceptualization |
|  |  |  | Demonstrated / modeled skill |
|  |  |  | Practiced skill in session |
|  |  |  | Gauged group understanding and mastery of skill |
|  |  |  | Assigned skills practice for between-session practice |
|  |  |  | Used treatment journal, including its role as a relapse prevention tool |
|  |  |  | Encouraged group to record lessons learned from the session in treatment log |
| Total: /8 | | | Comments: |

**Group Session 3**

| **No** | **Partial** | **Yes** | | **Therapeutic Frame** | |
| --- | --- | --- | --- | --- | --- |
|  |  |  | | Conducted Initial symptom/mood check | |
|  |  |  | | Set the agenda | |
|  |  |  | | Reviewed homework and treatment log | |
|  |  |  | | Assigned homework | |
| Total: /4 | | | Comments: | |

| **No** | **Partial** | **Yes** | **Skills Training: Mindfulness Training** |
| --- | --- | --- | --- |
|  |  |  | Explained rationale for skill |
|  |  |  | Explicitly tied skill to suicidal mode / case conceptualization |
|  |  |  | Demonstrated / modeled skill |
|  |  |  | Practiced skill in session |
|  |  |  | Gauged group understanding and mastery of skill |
|  |  |  | Assigned skills practice for between-session practice |
|  |  |  | Used treatment journal, including its role as a relapse prevention tool |
|  |  |  | Encouraged group to record lessons learned from the session in treatment log |
| Total: /8 | | | Comments: |

| **No** | **Partial** | **Yes** | **Skills Training: Crisis Support Person** |
| --- | --- | --- | --- |
|  |  |  | Explained rationale for skill |
|  |  |  | Explicitly tied skill to suicidal mode / case conceptualization |
|  |  |  | Identified potential support persons |
|  |  |  | Practiced skill in session: Role played conversation with partner |
|  |  |  | Gauged group understanding and mastery of skill |
|  |  |  | Assigned skills practice for between-session practice |
|  |  |  | Used treatment journal, including its role as a relapse prevention tool |
|  |  |  | Encouraged group to record lessons learned from the session in treatment log |
| Total: /8 | | | Comments: |

**Group Session 4**

| **No** | **Partial** | **Yes** | | **Therapeutic Frame** |
| --- | --- | --- | --- | --- |
|  |  |  | | Conducted Initial symptom/mood check |
|  |  |  | | Set the agenda |
|  |  |  | | Reviewed homework and treatment log |
|  |  |  | | Reviewed Crisis Support Conversations |
|  |  |  | | Assigned homework |
| Total: /5 | | | Comments: | |

| **No** | **Partial** | **Yes** | **Skills Training: Reasons for Living and Survival Kit** |
| --- | --- | --- | --- |
|  |  |  | Introduce the concept of reasons for living and provide rationale and connect to suicide mode |
|  |  |  | Discuss cultivating a life worth living |
|  |  |  | Brainstorm reasons for living as a group |
|  |  |  | Develop individual reasons for living for each group member |
|  |  |  | Elicit group members to share brief memories of reasons for living |
|  |  |  | Introduce Survival Kit |
|  |  |  | Provide Rationale and connect to suicide mode |
|  |  |  | Assign skills practice for between-session practice |
|  |  |  | Use treatment journal, including its role as a relapse prevention tool |
|  |  |  | Encouraged group to record lessons learned from the session in treatment log |
| Total: /10 | | | Comments: |

**Group Session 5**

| **No** | | **Partial** | | **Yes** | | | **Therapeutic Frame** | |
| --- | --- | --- | --- | --- | --- | --- | --- | --- |
|  | |  | |  | | | Conducted Initial symptom/mood check | |
|  | |  | |  | | | Set the agenda | |
|  | |  | |  | | | Reviewed homework and treatment log | |
|  | |  | |  | | | Assigned homework | |
| Total: /4 | | | | | | Comments: | | |
|  | | | | | |  | | |
| **No** | | **Partial** | | **Yes** | | | **Skills Training: Survival Kit** | |
|  | |  | |  | | | Explained rationale for skill | |
|  | |  | |  | | | Explicitly tied skill to suicidal mode / case conceptualization | |
|  | |  | |  | | | Established group rules for sharing | |
|  | |  | |  | | | Practiced skill in session: Shared survival kits | |
|  | |  | |  | | | Helped individuals tie in meaning to items they included in their kits | |
|  | |  | |  | | | Assigned skills practice for between-session practice | |
|  | |  | |  | | | Used treatment journal, including its role as a relapse prevention tool | |
|  | |  | |  | | | Encouraged group to record lessons learned from the session in treatment log | |
| Total: /8 | | | | | | | Comments: | |

**PHASE TWO: Undermining the Suicidal Belief System**

**Group Session 6**

| **No** | **Partial** | **Yes** | | **Therapeutic Frame** |
| --- | --- | --- | --- | --- |
|  |  |  | | Conducted Initial symptom/mood check |
|  |  |  | | Set the agenda |
|  |  |  | | Reviewed homework and treatment log |
|  |  |  | | Reviewed Treatment Plan |
|  |  |  | | Assigned homework |
| Total: /5 | | | Comments: | |

| **No** | **Partial** | **Yes** | **Skills Training: ABC Worksheets** |
| --- | --- | --- | --- |
|  |  |  | Introduced Phase II |
|  |  |  | Introduced the concept/rationale of ABC worksheet |
|  |  |  | Explicitly tied skill to suicidal mode / case conceptualization |
|  |  |  | Completed ABC worksheet using as group / highlighted core beliefs |
|  |  |  | Completed individual ABC worksheet for group members |
|  |  |  | Gauged group understanding and mastery of skill |
|  |  |  | Use treatment journal, including its role as a relapse prevention tool |
|  |  |  | Encourage group to record lessons learned from the session in treatment log |
| Total: /8 | | | Comments: |

**Group Session 7**

| **No** | **Partial** | **Yes** | | **Therapeutic Frame** |
| --- | --- | --- | --- | --- |
|  |  |  | | Conducted Initial symptom/mood check |
|  |  |  | | Set the agenda |
|  |  |  | | Reviewed homework and treatment log |
|  |  |  | | Assigned homework |
| Total: /4 | | | Comments: | |

| **No** | **Partial** | **Yes** | **Skills Training: Challenging Questions Worksheets** |
| --- | --- | --- | --- |
|  |  |  | Introduce the concept/rationale of challenge questions worksheet |
|  |  |  | Explicitly tied skill to suicidal mode / case conceptualization |
|  |  |  | Complete challenging questions worksheet as a group using a suicide-related belief (B) |
|  |  |  | Complete additional worksheets to increase generalization |
|  |  |  | Gauged group understanding and mastery of skill |
|  |  |  | Use treatment journal, including its role as a relapse prevention tool |
|  |  |  | Encourage group to record lessons learned from the session in treatment log |
| Total: /7 | | | Comments: |

**Group Session 8**

| **No** | **Partial** | **Yes** | | **Therapeutic Frame** |
| --- | --- | --- | --- | --- |
|  |  |  | | Conducted Initial symptom/mood check |
|  |  |  | | Set the agenda |
|  |  |  | | Reviewed homework and treatment log |
|  |  |  | | Assigned homework |
| Total: /4 | | | Comments: | |

| **No** | **Partial** | **Yes** | **Skills Training: Patterns of Problematic Thinking Worksheets** |
| --- | --- | --- | --- |
|  |  |  | Introduce the concept/rationale of patterns of problematic thinking worksheet |
|  |  |  | Explicitly tied skill to suicidal mode / case conceptualization |
|  |  |  | Completed patterns of problematic thinking worksheet as a group using a suicide-related belief (B) |
|  |  |  | Complete additional worksheets to increase generalization |
|  |  |  | Gauged group understanding and mastery of skill |
|  |  |  | Use treatment journal, including its role as a relapse prevention tool |
|  |  |  | Encourage group to record lessons learned from the session in treatment log |
| Total: /7 | | | Comments: |

**Group Session 9**

| **No** | **Partial** | **Yes** | | **Therapeutic Frame** |
| --- | --- | --- | --- | --- |
|  |  |  | | Conducted Initial symptom/mood check |
|  |  |  | | Set the agenda |
|  |  |  | | Reviewed homework and treatment log |
|  |  |  | | Assigned homework |
| Total: /4 | | | Comments: | |

| **No** | **Partial** | **Yes** | **Skills Training: Activity Planning** |
| --- | --- | --- | --- |
|  |  |  | Introduce the concept/rationale of activity planning |
|  |  |  | Explicitly tied skill to suicidal mode / case conceptualization |
|  |  |  | Identify pleasurable activities as a group |
|  |  |  | Create a plan for engaging in activity and elicit group buy-in around implementation |
|  |  |  | Problem solved potential barriers to implementation |
|  |  |  | Gauged group understanding and mastery of skills |
|  |  |  | Use treatment journal, including its role as a relapse prevention tool |
|  |  |  | Encouraged group to record lessons learned from the session in treatment log |
| Total: /8 | | | Comments: |

**Group Session 10**

| **No** | **Partial** | **Yes** | | **Therapeutic Frame** |
| --- | --- | --- | --- | --- |
|  |  |  | | Conducted Initial symptom/mood check |
|  |  |  | | Set the agenda |
|  |  |  | | Reviewed homework and treatment log |
|  |  |  | | Assigned homework |
| Total: /4 | | | Comments: | |

| **No** | **Partial** | **Yes** | **Skills Training: Coping Cards** |
| --- | --- | --- | --- |
|  |  |  | Introduce the concept/rationale of coping cards |
|  |  |  | Explicitly tied skill to suicidal mode / case conceptualization |
|  |  |  | Create coping cards (cognitive/behavioral) and plan for reviewing coping cards in between sessions |
|  |  |  | Gauge group understanding and mastery of skills |
|  |  |  | Use treatment journal, including its role as a relapse prevention tool |
|  |  |  | Encouraged group to record lessons learned from the session in treatment log |
| Total: /6 | | | Comments: |

**PHASE THREE: Relapse Prevention**

**Group Session 11**

| **No** | **Partial** | **Yes** | | **Therapeutic Frame** |
| --- | --- | --- | --- | --- |
|  |  |  | | Conducted Initial symptom/mood check |
|  |  |  | | Set the agenda |
|  |  |  | | Reviewed homework and treatment log |
|  |  |  | | Assigned homework |
| Total: /4 | | | Comments: | |

| **No** | **Partial** | **Yes** | **Relapse Prevention Task (RPT): Informed Consent** |
| --- | --- | --- | --- |
|  |  |  | Explained rationale for intervention |
|  |  |  | Elicited feedback and questions about RPT |
|  |  |  | Discussed the potential for negative emotional reactions to RPT |
|  |  |  | Identified coping strategies and skills as a group for use during RPT |
|  |  |  | Obtained the patient’s consent to conduct the RPT |
| Total: /5 | | | Comments: |

| **No** | **Partial** | **Yes** | **Relapse Prevention Task (RPT): Index Crisis** |
| --- | --- | --- | --- |
|  |  |  | Encouraged the patient to recount index episode |
|  |  |  | Strategically prompted the patient to increase memory vividness |
|  |  |  | Focused on beliefs, emotions, behaviors, and circumstances directly related to the crisis |
|  |  |  | Facilitated problem solving by introducing new challenges/barriers to skills use |
|  |  |  | Encouraged the patient to imagine use of learned skills |
|  |  |  | Debriefed task with group |
| Total: /6 | | | Comments: |

**Group Session 12**

| **No** | **Partial** | **Yes** | | **Therapeutic Frame** |
| --- | --- | --- | --- | --- |
|  |  |  | | Conducted Initial symptom/mood check |
|  |  |  | | Set the agenda |
|  |  |  | | Reviewed homework and treatment log |
|  |  |  | | Assigned homework |
| Total: /4 | | | Comments: | |

| **No** | **Partial** | **Yes** | **Relapse Prevention Task (RPT): Future Crisis** |
| --- | --- | --- | --- |
|  |  |  | Collaboratively identified likely triggers for future suicidal episodes as a group |
|  |  |  | Encouraged the patient to recount future suicidal episodes |
|  |  |  | Strategically prompted the patient to increase memory vividness |
|  |  |  | Focused on beliefs, emotions, behaviors, and circumstances directly related to the crisis |
|  |  |  | Facilitated problem solving by introducing new challenges/barriers to skills use |
|  |  |  | Encouraged the patient to imagine use of learned skills |
|  |  |  | Debriefed task with group |
| Total: /7 | | | Comments: |
